# Supplementary material
Source: MDPI journal article supplement (https://www.mdpi.com/2073-4344/13/3/580)
Supplement: s1 [file s1]

# Enhanced Cyclopentanone Yield from Furfural Hydrogenation: Promotional Effect of Surface Silanols on Ni-Cu/m-silica Catalyst

Ravi Balaga <sup>1,2,3,4</sup>, Putrakumar Balla <sup>5</sup>, Xiaoqiang Zhang <sup>1,2,3</sup>, Kishore Ramineni <sup>6</sup>, Hong Du <sup>1,2,3</sup>, Shrutika Lingalwar <sup>4</sup>, Vijayanand Perupogu <sup>4</sup> and Zongchao Conrad Zhang <sup>1,2,\*</sup>

<sup>1</sup> State Key Laboratory of Catalysis, Dalian Institute of Chemical Physics, Chinese Academy of Sciences, Dalian 116023, China

<sup>2</sup> Dalian National Laboratory for Clean Energy, Dalian Institute of Chemical Physics, Chinese Academy of Sciences, Dalian 116023, China

<sup>3</sup> University of Chinese Academy of Sciences, Beijing 100049, China

<sup>4</sup> Energy & Environmental Engineering Department CSIR-Indian, Institute of Chemical Technology, Hyderabad 500007, Telangana, India

<sup>5</sup> Department of Chemical Engineering and Applied Chemistry, Chungnam National University, Daejeon 34134, Republic of Korea

<sup>6</sup> Department of Chemistry, Anurag University, Hyderabad 500088, Telangana, India

\* Correspondence: zczhang@yahoo.com

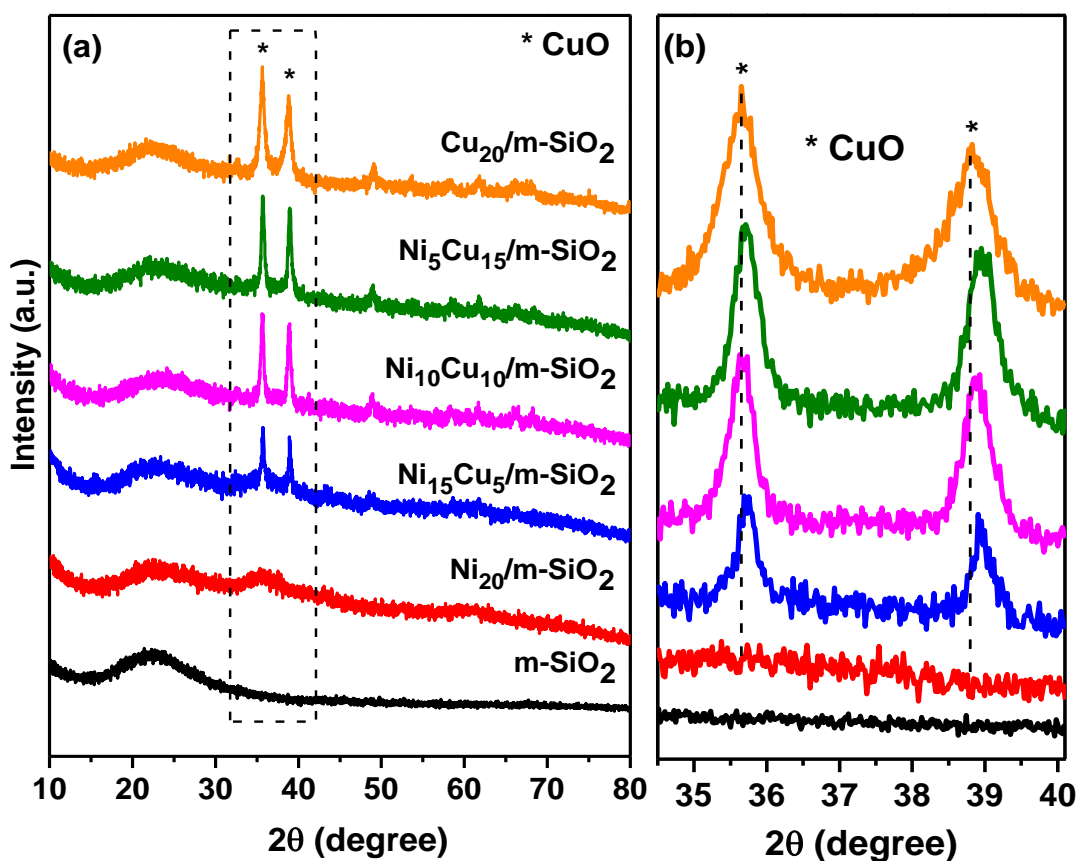

**Figure S1.** (a) XRD patterns of calcined pure m-SiO<sub>2</sub> and Ni<sub>x</sub>Cu<sub>y</sub>/m-SiO<sub>2</sub> (total metal loading fixed at 20 wt.% with varied relative Ni and Cu loading) and (b) expanded view of XRD patterns in 2θ from 34° to 40°.

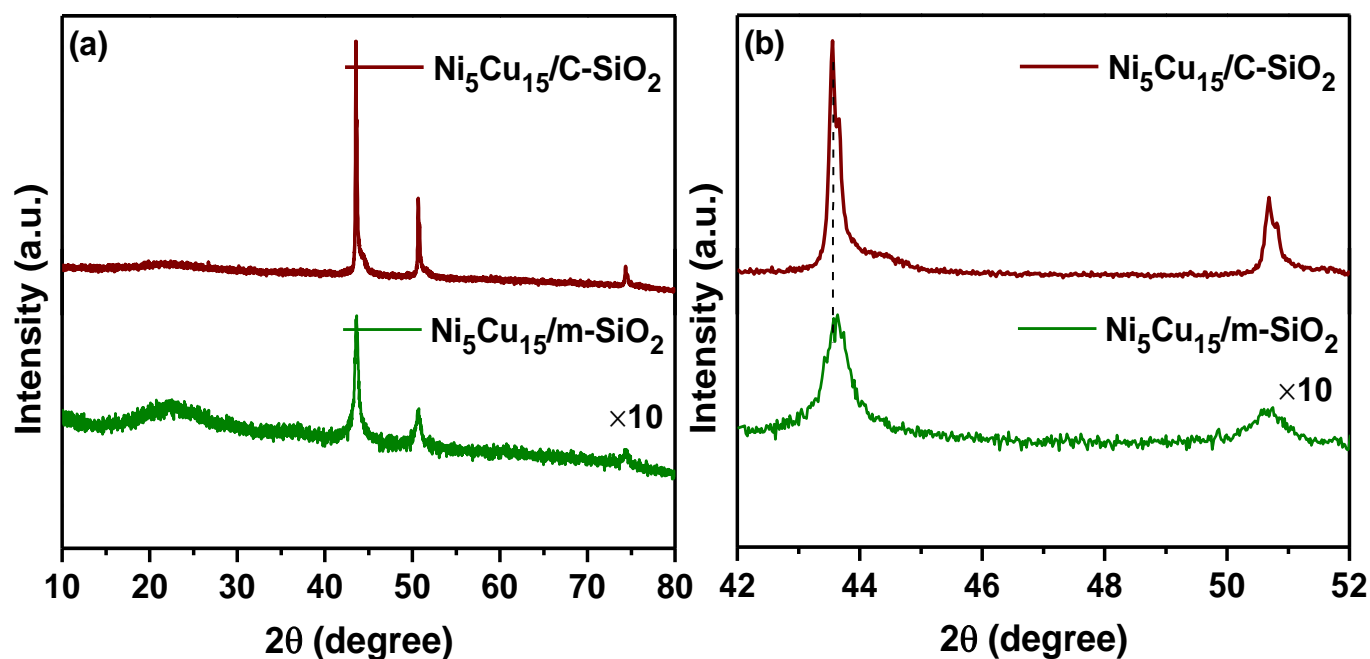

Figure S2. (a) XRD patterns of reduced  $\text{Ni}_5\text{Cu}_{15}/\text{m-SiO}_2$  and  $\text{Ni}_5\text{Cu}_{15}/\text{C-SiO}_2$  catalysts and (b) expanded view of XRD patterns in  $2\theta$  from  $42^\circ$  to  $52^\circ$ .

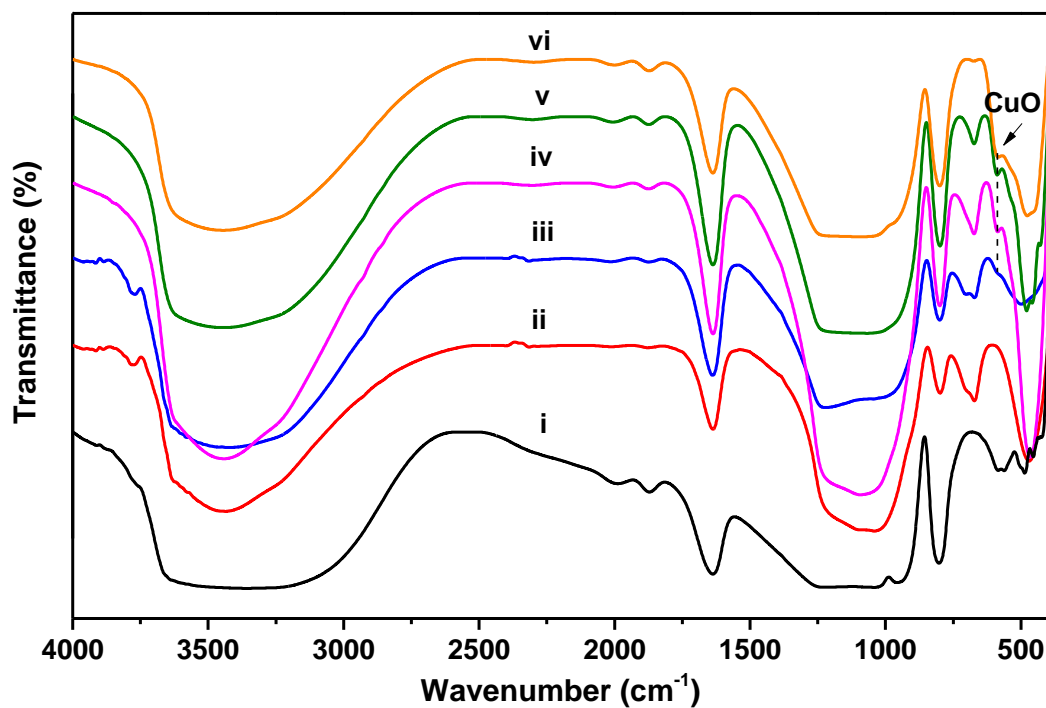

Figure S3. FTIR spectra of calcined (i) pure  $\text{m-SiO}_2$ , (ii)  $\text{Ni}_{20}/\text{m-SiO}_2$ , (iii)  $\text{Ni}_{15}\text{Cu}_5/\text{m-SiO}_2$ , (iv)  $\text{Ni}_{10}\text{Cu}_{10}/\text{m-SiO}_2$ , (v)  $\text{Ni}_5\text{Cu}_{15}/\text{m-SiO}_2$ , and (vi)  $\text{Cu}_{20}/\text{m-SiO}_2$  catalysts.

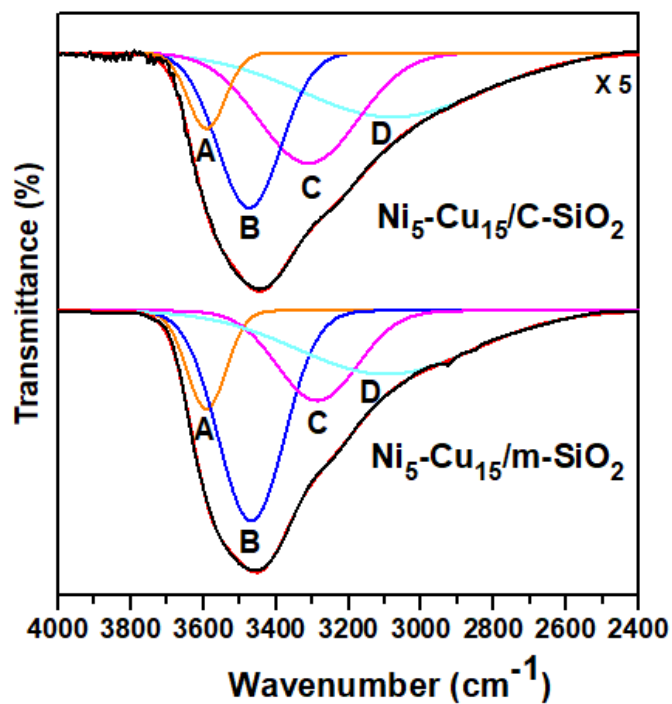

Figure S4. FTIR of reduced catalysts.

Table S1. Characteristic spectra peaks of FTIR.

| S.No | Catalyst                                              | A+B (%) | C+D (%) |
|------|-------------------------------------------------------|---------|---------|
| 1    | Ni <sub>5</sub> -Cu <sub>15</sub> /m-SiO <sub>2</sub> | 49      | 51      |
| 2    | Ni <sub>5</sub> -Cu <sub>15</sub> /C-SiO <sub>2</sub> | 36      | 64      |

FT-IR spectra of between 3400-3600 cm<sup>-1</sup> assigned to mono hydrogen bonded silanols (A+B) and 3200 cm<sup>-1</sup> corresponding to the poly-hydrogen bonded silanols (C+D) [53].

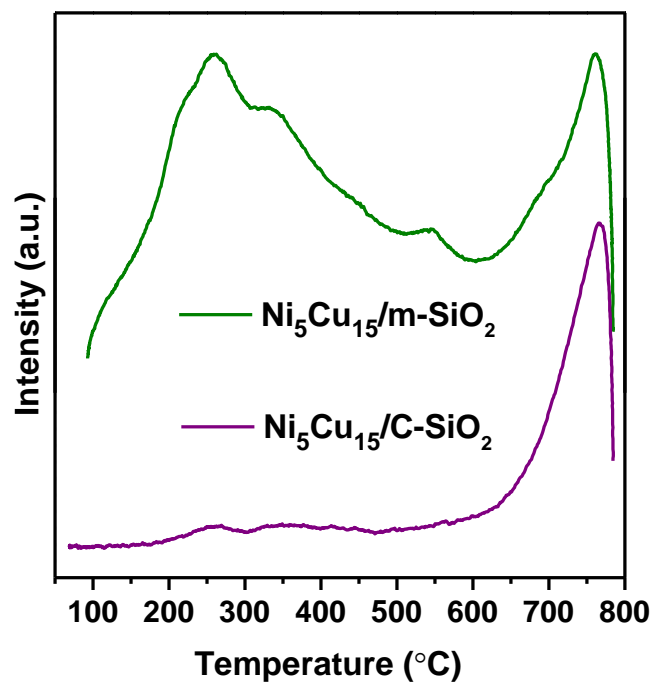

Figure S5.  $\text{NH}_3$ -TPD of  $\text{Ni}_5\text{Cu}_{15}/\text{m-SiO}_2$  and  $\text{Ni}_5\text{Cu}_{15}/\text{C-SiO}_2$ .

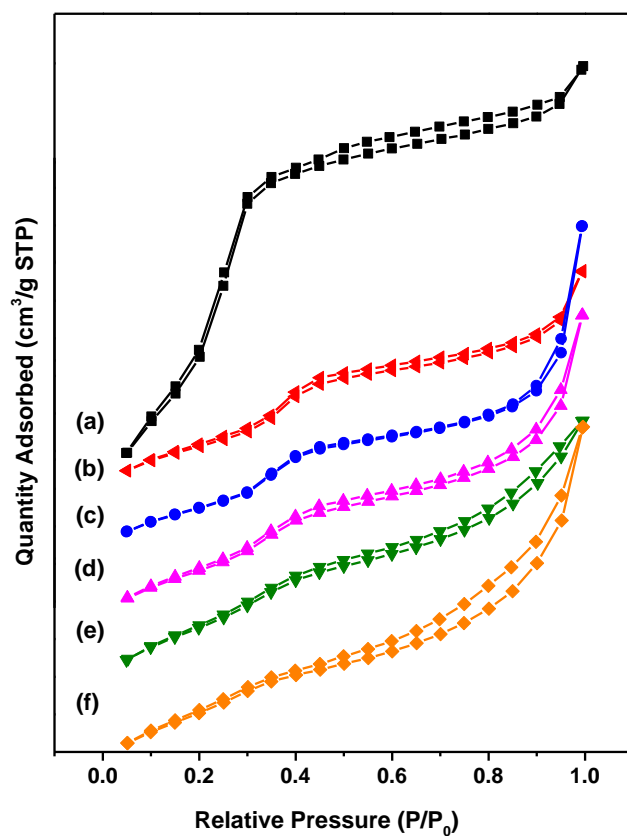

Figure S6. BET of silica after metal loading on silica. (a)  $\text{m-SiO}_2$ , (b)  $\text{Ni}_{20}/\text{m-SiO}_2$ , (c)  $\text{Ni}_{15}\text{Cu}_5/\text{m-SiO}_2$ , (d)  $\text{Ni}_{10}\text{Cu}_{10}/\text{m-SiO}_2$ , (e)  $\text{Ni}_5\text{Cu}_{15}/\text{m-SiO}_2$ , and (f)  $\text{Cu}_{20}/\text{m-SiO}_2$ .

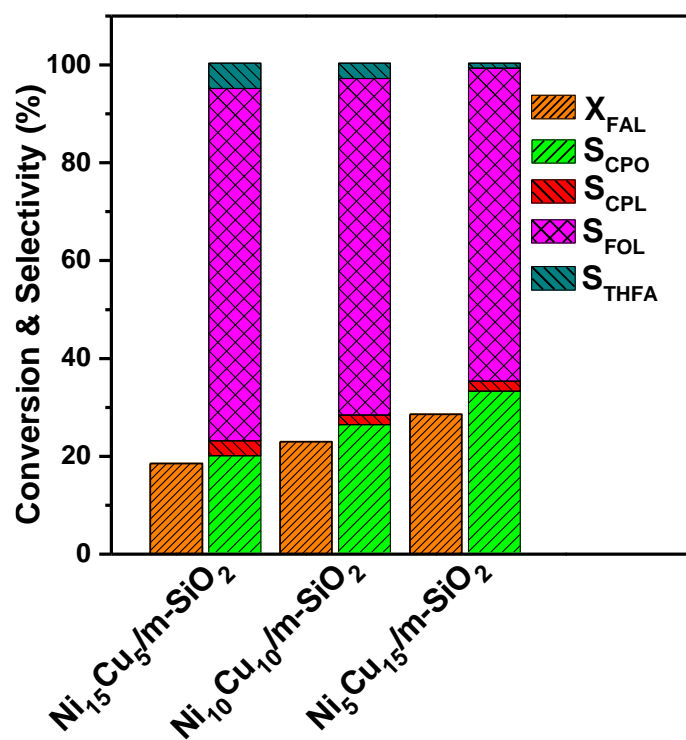

**Figure S7.** Catalytic performance in furfural (FAL) hydrogenation over metals supported on m-SiO<sub>2</sub>. Reaction condition: 5.2 mmol FAL, 15 mL water, catalyst 0.05 g, 140 °C, 3 MPa H<sub>2</sub>, and 4 h.

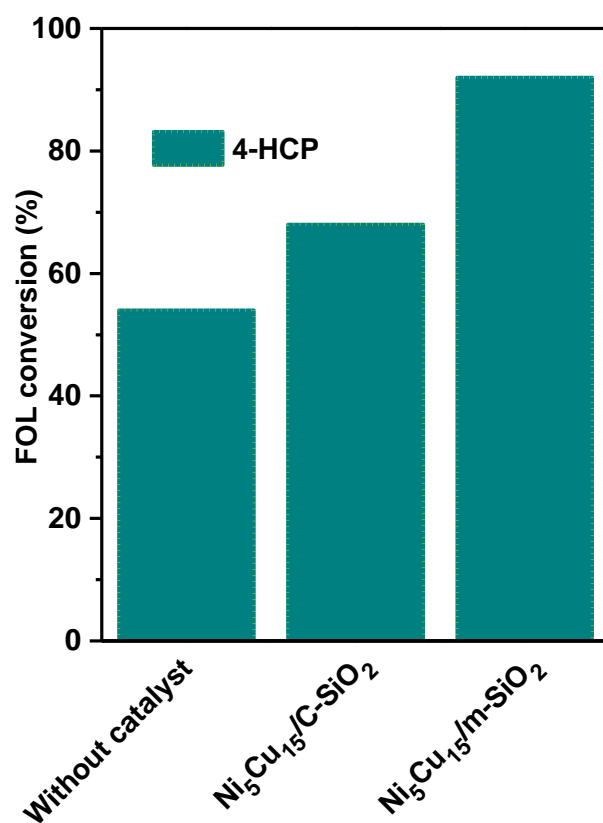

**Figure S8.** Rearrangement of furfuryl alcohol (FOL) to 4-hydroxy-2-cyclopentenone (4-HCP). Reaction condition: 5.2 mmol FOL, 15 mL water, reduced catalyst 0.17 g, 140 °C, 3 MPa N<sub>2</sub>, 4 h.

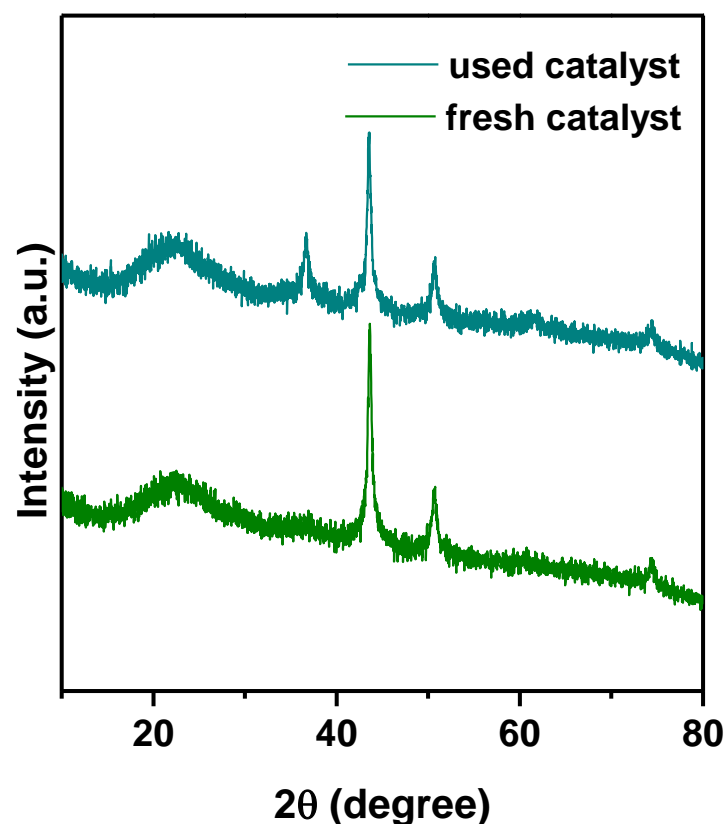

Figure S9. XRD of Ni<sub>5</sub>Cu<sub>15</sub>/m-SiO<sub>2</sub>

Reference:

53. Hu, N.; Rao, Y.; Sun, S.; Hou, L.; Wu, P., Fan, S., Ye, B. Structural Evolution of Silica Gel and Silsesquioxane Using Thermal Curing, *Appl. Spectrosc.* 2016, 70, 1328–1338. <https://doi.org/10.1177/0003702816654063>.
